# Supplementary material for: circMTND5 Participates in Renal Mitochondrial Injury and Fibrosis by Sponging MIR6812 in Lupus Nephritis
Source: Hindawi journal article supplement (doi:10.1155/2022/2769487), 2022-01-01
Supplement: f1 [file 2769487.f1.pdf]

(A) Mito-Tracker Red and FISH in HK-2 cell

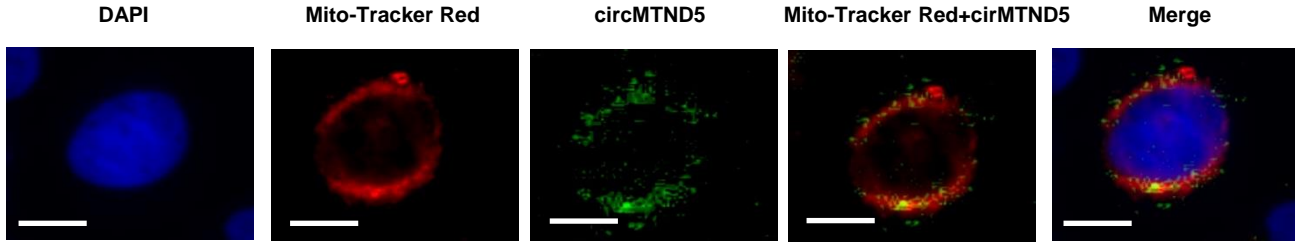

(B) FISH and COX IV in HK-2 cell

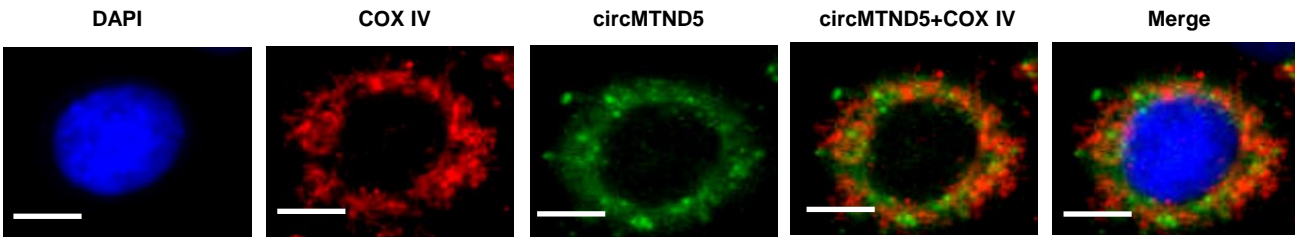

(C) qPCR in HK-2 cell

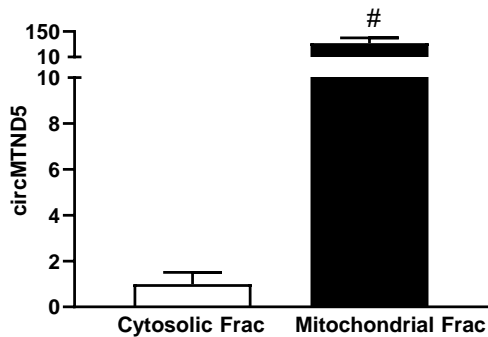

**Supplemental Figure 1. Localization of circMTND5 to mitochondria of HK-2 cells.**

(A) Co-localization of Mito-Tracker Red staining and circMTND5 by FISH demonstrates the circMTND5 is present in mitochondria, arrayed in circle around the nucleus (magnification 725 $\times$ , bar=80 $\mu$ m). (B) Co-localization of mitochondrial cytochrome c oxidase subunit 4 (COX IV) by IF staining and circMTND5 by FISH (magnification 725 $\times$ , bar=80 $\mu$ m). (C) Expression of circMTND5 in mitochondrial fraction and cytosolic fraction. Data are presented as mean  $\pm$  SD, from three experiments with triplicate respectively, # denotes  $p < 0.05$ , mitochondrial fraction vs. cytosolic fraction.

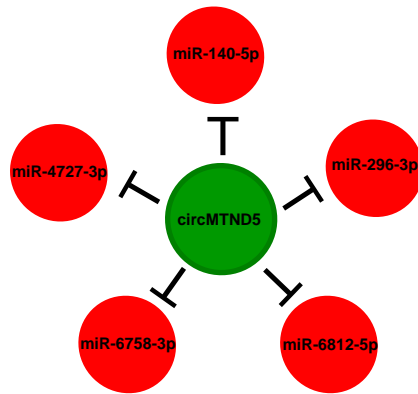

**Supplemental Figure 2. The top five miRNAs interacting with circMTND5.**

Schematic cartoon of circMTND5 in pathogenesis of LN by sponging MIR6812 and other four miRNAs based on the binding strength.

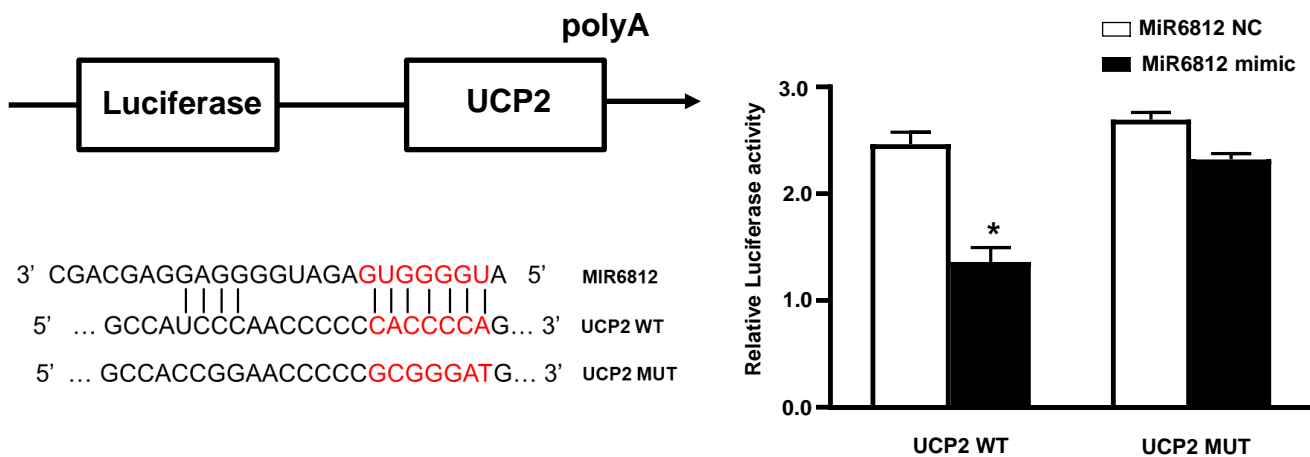

**Supplemental Figure 3. Interaction between MIR6812 and UCP2 in HEK293T cells.** Direct interaction of MIR6812 and UCP2 was confirmed by luciferase reporter assays

**Supplemental Table 1. The clinical characteristics of lupus nephritis patients**

| Pt. # | Age | Gender | SLEDAI<br>(score) | eGFR<br>(ml/min/1.73m <sup>2</sup> ) | Urine           | Blood        |     |        |              |             | Renal biopsy  |               |
|-------|-----|--------|-------------------|--------------------------------------|-----------------|--------------|-----|--------|--------------|-------------|---------------|---------------|
|       |     |        |                   |                                      | URTP<br>(g/day) | Alb<br>(g/L) | ANA | ds-DNA | IgG<br>(g/L) | C4<br>(g/L) | AI<br>(score) | CI<br>(score) |
| 1     | 52  | F      | 22                | 44                                   | 5.8             | 24.3         | 2+  | 1+     | 7.3          | 0.07        | 13            | 5             |
| 2     | 26  | F      | 26                | 138                                  | 0.5             | 20.1         | 2+  | 1+     | 28.3         | 0.17        | 10            | 0             |
| 3     | 35  | F      | 22                | 50                                   | 2.5             | 21.5         | 2+  | 1+     | 12.4         | 0.03        | 10            | 3             |
| 4     | 40  | F      | 18                | 46                                   | 15.3            | 21.0         | 2+  | -      | 9.3          | 0.15        | 13            | 2             |
| 5     | 40  | F      | 20                | 120                                  | 0.2             | 19.5         | 2+  | -      | 19.9         | 0.02        | 7             | 0             |
| 6     | 49  | F      | 21                | 112                                  | 3.5             | 24.4         | 2+  | 1+     | 12.6         | 0.03        | 4             | 1             |
| 7     | 39  | M      | 25                | 125.2                                | 10.9            | 23.2         | 2+  | 2+     | 5.5          | 0.1         | 13            | 0             |
| 8     | 18  | F      | 36                | 221                                  | 8.9             | 15.8         | 2+  | -      | 12.6         | 0.03        | 1             | 0             |
| 9     | 36  | F      | 30                | 123                                  | 2.5             | 28.3         | 2+  | 1+     | 21.7         | 0.05        | 4             | 0             |
| 10    | 44  | F      | 14                | 94                                   | 2.6             | 28.3         | 1+  | -      | 18.1         | 0.25        | 8             | 6             |
| 11    | 22  | F      | 22                | 139                                  | 15.8            | 15.0         | 2+  | 2+     | 7.6          | 0.07        | 14            | 0             |
| 12    | 41  | F      | 17                | 91                                   | 1.49            | 23.0         | 2+  | ±      | 12.7         | 0.1         | 9             | 1             |
| 13    | 39  | F      | 10                | 92.75                                | 1.66            | 32.3         | 2+  | -      | 13.8         | 0.15        | 4             | 6             |
| 14    | 26  | M      | 18                | 206.01                               | 6.62            | 32.8         | 1+  | -      | 10.8         | 0.03        | 13            | 3             |

Pt, patient; M/F, male/Female; SLEDAI, systemic lupus erythematosus diseases activity index; eGFR, estimated glomerular filtration rate based on CKD-EPI formula; URTP, urinary total proteinuria per day; Alb, albumin; ANA, antinuclear antibodies; ds-DNA, double strands DNA; IgG, immunoglobulin G; C4, complement 4; AI, activity index; CI, chronicity index. #1-7 for circRNA microarray, #8-14 for circRNA validation

**Supplemental Table 2. The clinical characteristics of normal control human subjects**

| NC# | Age | Gender | eGFR<br>(ml/min/1.73m <sup>2</sup> ) | Urine       |         | Serum        |
|-----|-----|--------|--------------------------------------|-------------|---------|--------------|
|     |     |        |                                      | Proteinuria | Gravity | Alb<br>(g/L) |
| 1   | 32  | F      | 106                                  | ±           | 1.024   | 43.6         |
| 2   | 50  | F      | 139                                  | -           | 1.016   | 37           |
| 3   | 47  | F      | 86                                   | -           | 1.029   | 40.9         |
| 4   | 53  | F      | 122                                  | 1+          | 1.016   | 42.3         |
| 5   | 53  | F      | 120                                  | -           | 1.01    | 41.7         |
| 6   | 60  | M      | 125.1                                | -           | 1.019   | 38.4         |
| 7   | 47  | F      | 117                                  | ±           | 1.025   | 45.2         |
| 8   | 59  | F      | 115                                  | -           | 1.009   | 36.4         |
| 9   | 46  | F      | 104                                  | -           | 1.016   | 43           |
| 10  | 54  | F      | 122                                  | -           | 1.021   | 40.7         |
| 11  | 52  | F      | 123                                  | ±           | 1.024   | 40           |
| 12  | 42  | M      | 96.9                                 | -           | 1.008   | 47.8         |

NC, normal control indicated normal kidney tissue from patients with renal tumor. eGFR, estimated glomerular filtration rate based on CKD-EPI formula; Alb, albumin. #1-6 for circRNA microarray, #7-12 for circRNA validation

**Supplemental Table 3. RNA sequences used in qPCR and cell transfection**

| Gene              | Forward(5'-3')            | Reverse(5'-3')           |
|-------------------|---------------------------|--------------------------|
| <i>UCP2</i>       | CCCCGAAGCCTCTACAATGG      | CTGAGCTTGAATCGGACCTT     |
| <i>PGC1A</i>      | TCTGAGTCTGTATGGAGTGACAT   | CCAAGTCGTTACATCTAGTTCA   |
| <i>OPA1</i>       | TGTGAGGTCTGCCAGTCTTTA     | TGTCCTTAATTGGGGTCGTTG    |
| <i>COL3</i>       | GGAGCTGGCTACTTCTCGC       | GGGAACATCCTCCTCAACAG     |
| <i>FN</i>         | CGGTGGCTGTGAGTCAAAG       | AAACCTCGGCTTCTCCATAA     |
| circMTND5         | CAACCACCACCCATCAT         | ATTGCTCGGGGAATAGG        |
| <i>GAPDH</i>      | GGAGCGAGATCCCTCCAAAAT     | GGCTGTTGTCATACTTCTCATGG  |
| <i>MIR6812</i>    | ATGGGGTGAGATGGGGAGGAGCAGC | CAGTGCCTGTCGTGGAGT       |
| <i>U6</i>         | GGGATGGGGTGAGATGGGGAGG    | CAGTGCCTGTCGTGGAGT       |
| circMTND5-NC1     | UUCUCCGAACGUGUCACGUTT     | ACGUGACACGUUCGGAGAATT    |
| circMTND5-RNAi    | TCACCAAGACCTCAACCCA       |                          |
| MIR6812-NC1       | UCACAACCUCCUAGAAAGAGUAGA  | UCUACUCUUUCUAGGAGGUUGUGA |
| MIR6812 mimic     | AUGGGGUGAGAUGGGGAGGAGCAGC | GCUGCUCCUCCCAUCUCACCCCAU |
| MIR6812-NC2       | UCUACUCUUUCUAGGAGGUUGUGA  |                          |
| MIR6812 inhibitor | GCUGCUCCUCCCAUCUCACCCCAU  |                          |

*UCP2*, uncoupling protein 2; *PGC1A*, peroxisome proliferator-activated receptor gamma coactivator 1-alpha; *OPA1*, optic atrophy 1; *COL3*, collagen type III ; *FN*, fibronectin. circ-NC1, negative control of circMTND5 RNA interference; circ-RNAi, circMTND5 RNA interference; MIR6812-NC1, negative control of MIR6812 mimic; MIR6812-NC2, negative control of MIR6812 inhibitor.

### Supplemental Table 4. Probes used in FISH and RNA pull-down

| Gene          | 5'-3'                                                      | Application   |
|---------------|------------------------------------------------------------|---------------|
| circMTND5-NC  | FAM-ACTCACCAAGACCTCAACCCAAAAAGGCA-FAM                      | FISH          |
| circMTND5     | FAM-TTTGGGTTGAGGTCTTGGTGAGTGTT-FAM                         | FISH          |
| MIR6812-NC    | CY3-TCACAACCTCCTAGAAAGAGTAGA-CY3                           | FISH          |
| MIR6812       | CY3-GCTGCTCCTCCCATCTCACCCCAT-CY3                           | FISH          |
| miR-150       | FAM-CACTGGTACAAGGGTTGGGAGA-FAM                             | FISH          |
| miR-30a       | CY3-TGTAAACATCCTCGACTGGAAG-CY3                             | FISH          |
| Bio-NC        | Biotin-AAACCCCACTAAAACACTCACCAAGACCTCAACCCAAAAAGGCATAATTAA | RNA pull-down |
| Bio-circMTND5 | Biotin-AAATTAATTATGCCTTTTTGGGTTGAGGTCTTGGTGAGTGTTTTAGTGGGG | RNA pull-down |

FISH, Fluorescence in situ hybridization; circ-NC, negative control of circMTND5 on FISH; MIR-NC, negative control of MIR6812 on FISH; Bio-NC, biotinylated negative control.

## Supplemental Table 5. Antibodies used in immunostaining and Western blotting

| Antibodies        | Company                 | Catalog       | Host   | Dilution                     |
|-------------------|-------------------------|---------------|--------|------------------------------|
| UCP2              | Abcam                   | Ab97931       | Rabbit | 1:200 (IF) and 1:1000 (WB)   |
| PGC-1 $\alpha$    | Abcam                   | Ab54481       | Rabbit | 1:300 (IF) and 1:1000 (WB)   |
| OPA1              | Abcam                   | Ab157457      | Rabbit | 1:200 (IF)                   |
| COL3              | Acris                   | AF5810        | Mouse  | 10ug/ml (IF) and 1:1000 (WB) |
| FN                | Santa Cruz              | sc18825       | Mouse  | 10ug/ml (IF) and 1:1000 (WB) |
| COX IV            | Servicebio              | GB11250       | Rabbit | 1:500 (IF)                   |
| AGO2              | Zenbio                  | 381637        | Rabbit | 1:500 (IF)                   |
| $\alpha$ -TUBULIN | CST                     | 2148          | Rabbit | 1:1000 (WB)                  |
| Alexa Fluor® 488  | Thero Fisher Scientific | A21202/A21203 | Donkey | 1:300                        |
| Alexa Fluor® 594  | Thero Fisher Scientific | A21207/A20206 | Donkey | 1:300                        |

UCP2, uncoupling protein 2; PGC-1 $\alpha$ , peroxisome proliferator-activated receptor gamma coactivator 1-alpha; COL3, collagen type III; FN, fibronectin; COX IV, cytochrome C oxidase subunit IV; OPA1, optic atrophy 1; AGO2, Argonaute 2; IF, immunofluorescent staining; WB, Western blotting.



**Supplemental Table 6. 32 significantly decreased circRNAs**

| CircRNAID                 | P-value         | Fold Change     | Source       | GeneName     | Predicted sequence length |
|---------------------------|-----------------|-----------------|--------------|--------------|---------------------------|
| <b>chrM:14068-14413+</b>  | <b>1.91E-05</b> | <b>70.70488</b> | <b>novel</b> | <b>MTND5</b> | <b>346</b>                |
| chrM:14131-15754-         | 0.00036         | 39.82782        | novel        | JA760602     | 1624                      |
| chrM:14131-15754+         | 0.006914        | 23.96471        | novel        | MTND5        | 1624                      |
| chrM:15492-15740-         | 0.000241        | 23.77568        | novel        | JA760602     | 249                       |
| chrM:14068-14923+         | 0.006209        | 19.31961        | novel        | MTND5        | 856                       |
| chrM:14068-14446+         | 0.00085         | 19.16315        | novel        | MTND5        | 379                       |
| chrM:14056-14263-         | 0.005933        | 18.81315        | novel        | JA760602     | 208                       |
| chrM:14068-14923-         | 0.048645        | 17.05835        | novel        | JA760602     | 856                       |
| chrM:13856-14421-         | 0.005469        | 14.36966        | novel        | JA760602     | 566                       |
| chrM:14056-14377-         | 0.01469         | 10.83938        | novel        | JA760602     | 322                       |
| chrM:14074-14394-         | 0.006651        | 10.18194        | novel        | JA760602     | 321                       |
| chrM:9044-11249-          | 0.009304        | 9.840272        | novel        | JA760602     | 2206                      |
| chrM:5169-6247-           | 0.014753        | 8.885925        | novel        | JA429830     | 1079                      |
| chrM:13847-14413-         | 0.03345         | 8.625013        | novel        | JA760602     | 567                       |
| chrM:14068-15403-         | 0.006879        | 8.224576        | novel        | JA760602     | 1336                      |
| chrM:7749-8685-           | 0.037152        | 7.79038         | novel        | JA760602     | 937                       |
| chrM:14056-14263+         | 0.038915        | 7.749908        | novel        | MTND5        | 208                       |
| chrM:4198-6296-           | 0.032663        | 6.958123        | novel        | JA429830     | 2099                      |
| chrM:7749-8685+           | 0.037808        | 6.936876        | novel        | OK/SW-cl.16  | 937                       |
| chrM:14213-15778+         | 0.040172        | 6.503446        | novel        | cytochrome b | 1566                      |
| chrM:5483-6492-           | 0.039652        | 5.793912        | novel        | JA429830     | 1010                      |
| chrM:13940-15335-         | 0.042623        | 5.740001        | novel        | JA760602     | 1396                      |
| chrM:2227-8441-           | 0.031038        | 4.809761        | novel        | JA429830     | 6215                      |
| chrM:3323-3598-           | 0.031496        | 4.809761        | novel        | TVAS5        | 276                       |
| chrM:5169-8175-           | 0.03985         | 4.36092         | novel        | JA429830     | 3007                      |
| chrM:5169-8175+           | 0.041941        | 4.201714        | novel        | OK/SW-cl.16  | 3007                      |
| chrM:5310-8625-           | 0.041101        | 4.005007        | novel        | JA429830     | 3316                      |
| chr15:64791492-64792365-  | 0.046044        | 3.743301        | novel        | ZNF609       | 874                       |
| chr7:142105140-142162950- | 0.038978        | 3.743301        | novel        | CDR3         | 57811                     |
| chrM:3526-5337-           | 0.042366        | 3.568056        | novel        | MT-TQ        | 1812                      |
| chrM:14005-14277-         | 0.049895        | 3.334902        | novel        | JA760602     | 273                       |
| chrM:14330-14923+         | 0.045173        | 3.334902        | novel        | cytochrome b | 594                       |
